# Supplementary material for: Axotomy-induced neurotrophic withdrawal causes the loss of phenotypic differentiation and downregulation of NGF signalling, but not death of septal cholinergic neurons
Source: PubMed Central journal article supplement (PMC2826326; doi:10.1186/1750-1326-5-5), 2010-01-19

Neurotrace

Act casp3

p53

overlay

unlesioned

H<sub>2</sub>O<sub>2</sub> injected

150μm

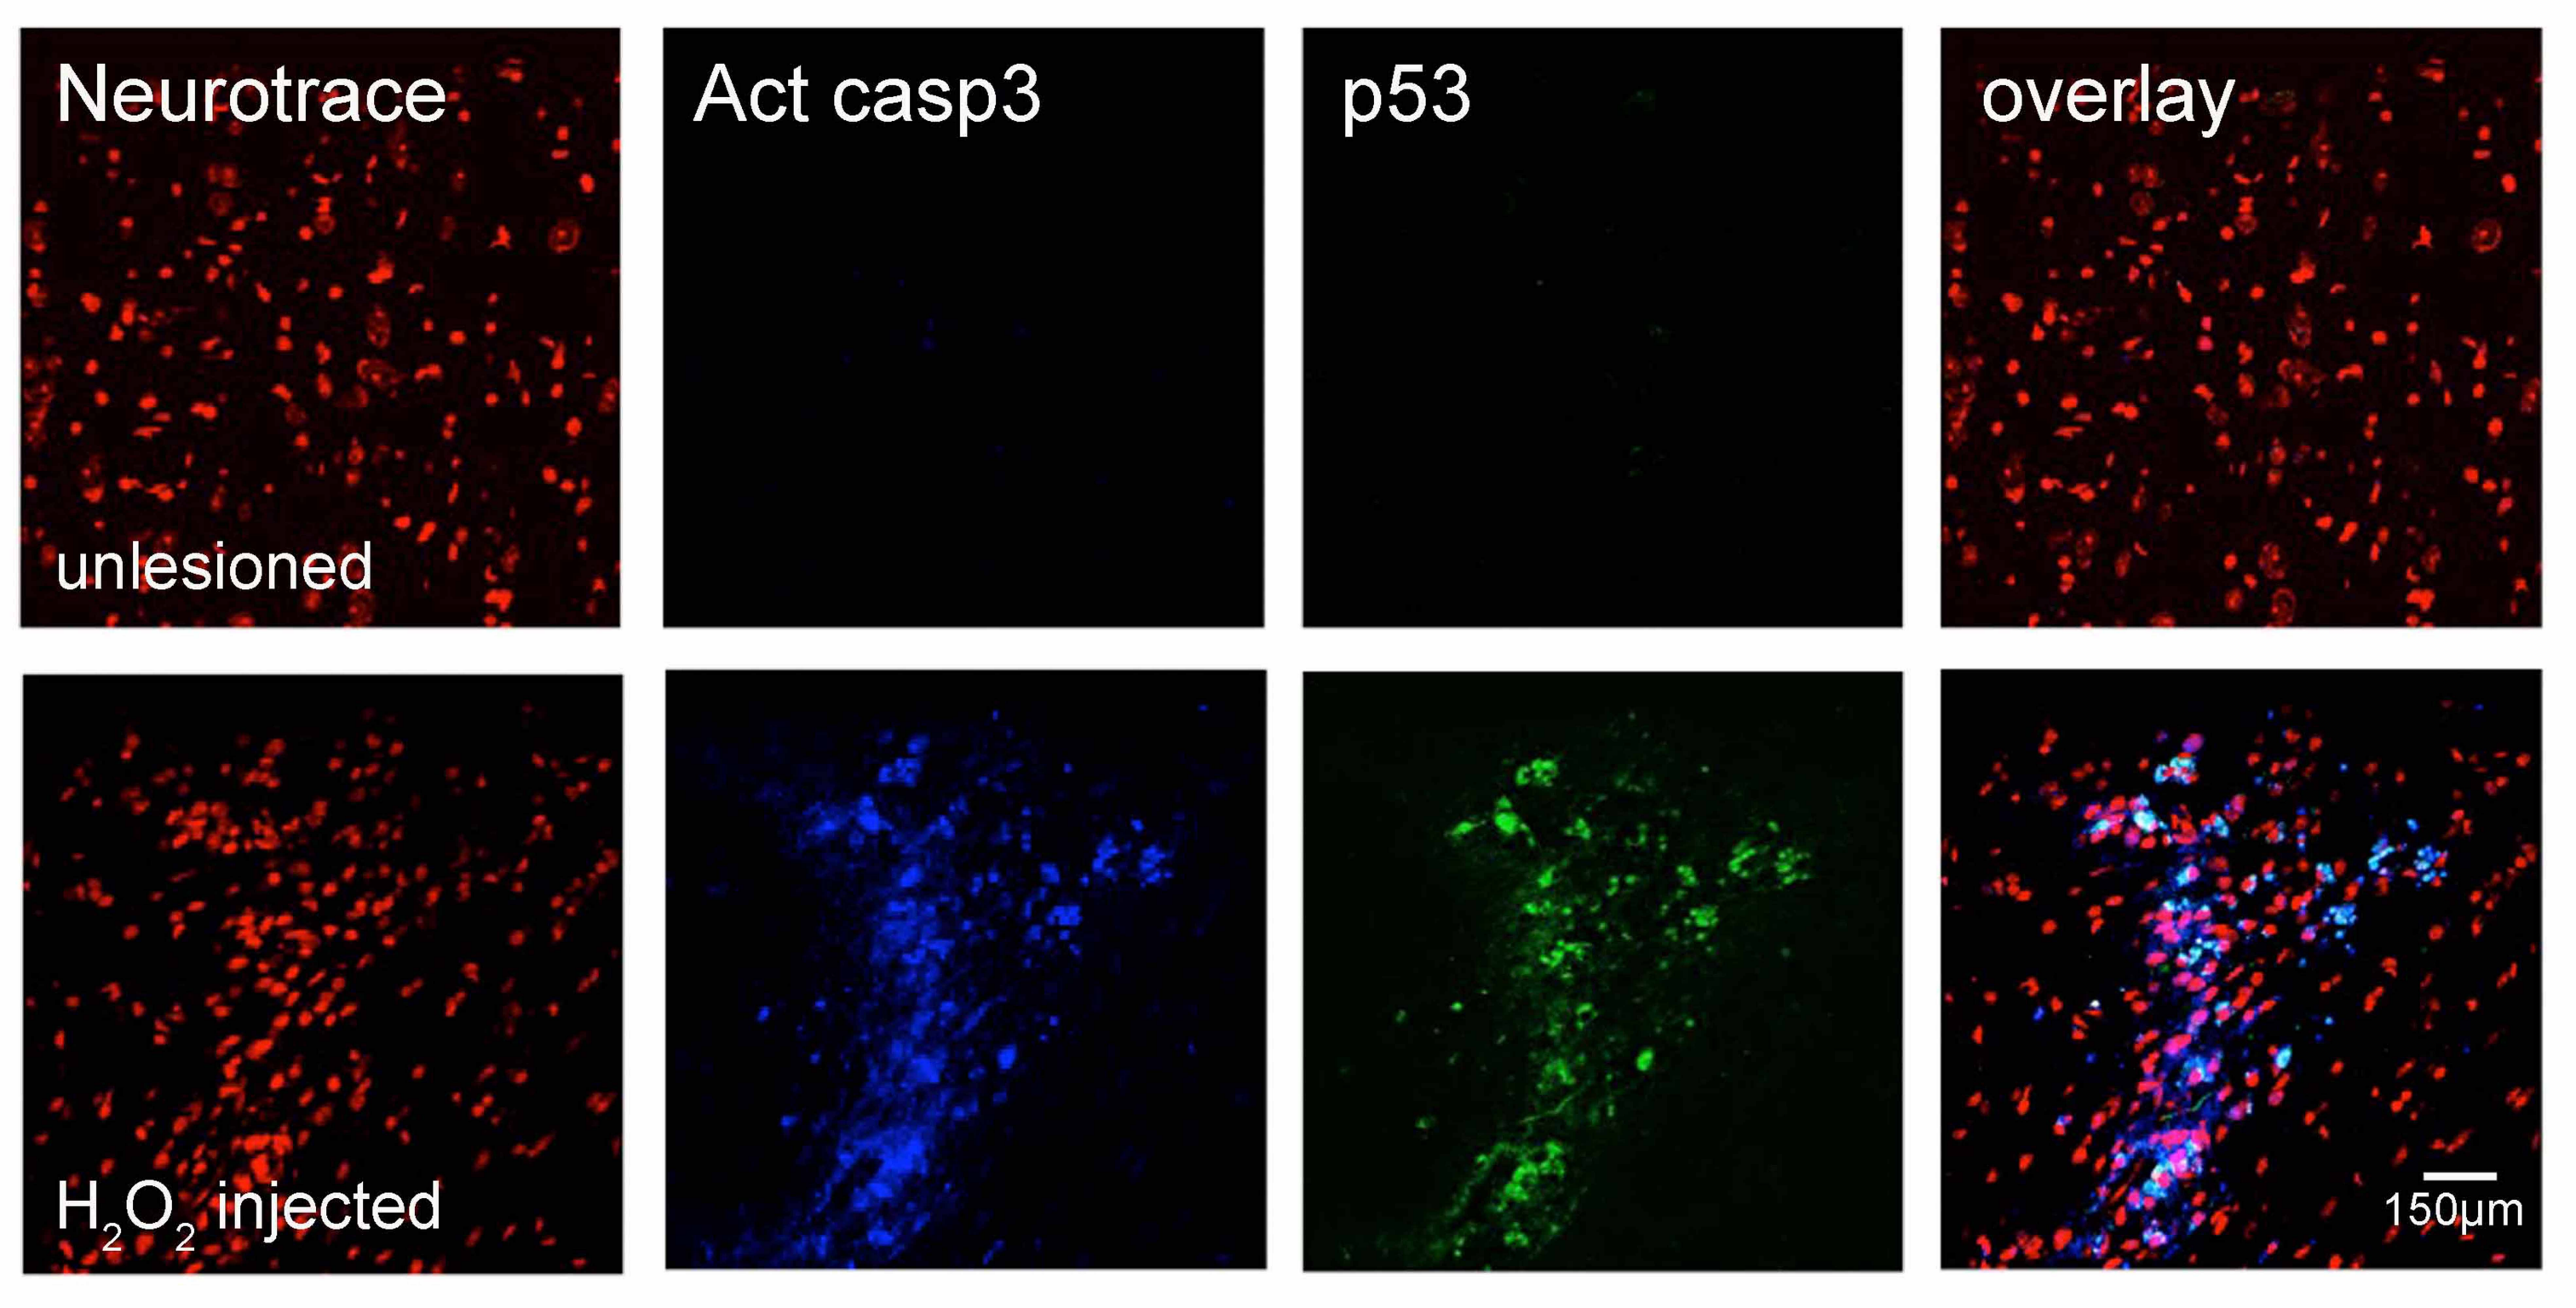

Supplement: 1750-1326-5-5-S1.pdf [file 1750-1326-5-5-S1.pdf]
