# Supplementary material for: Axotomy-induced neurotrophic withdrawal causes the loss of phenotypic differentiation and downregulation of NGF signalling, but not death of septal cholinergic neurons
Source: PubMed Central journal article supplement (PMC2826326; doi:10.1186/1750-1326-5-5), 2010-01-19

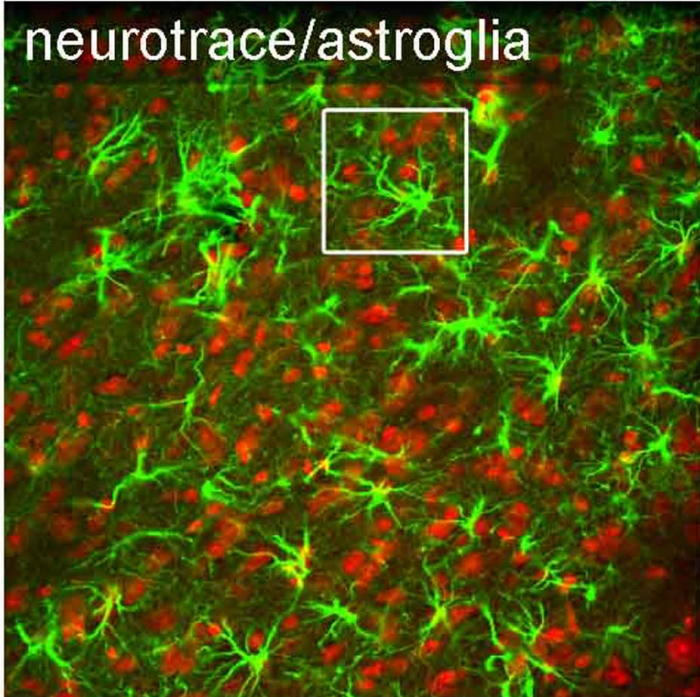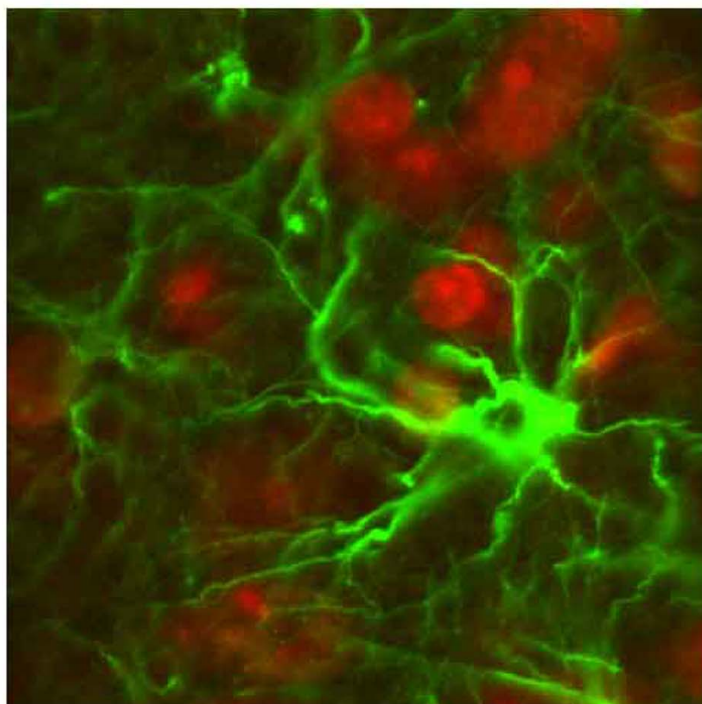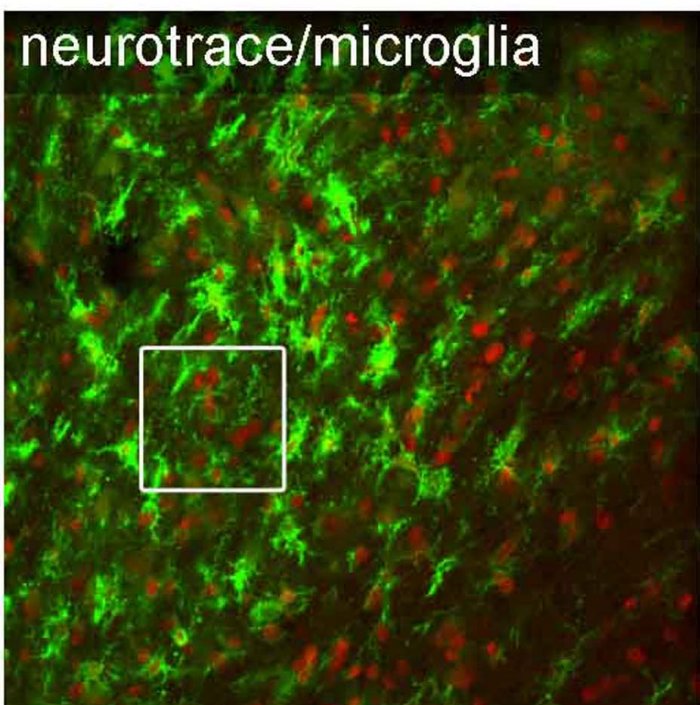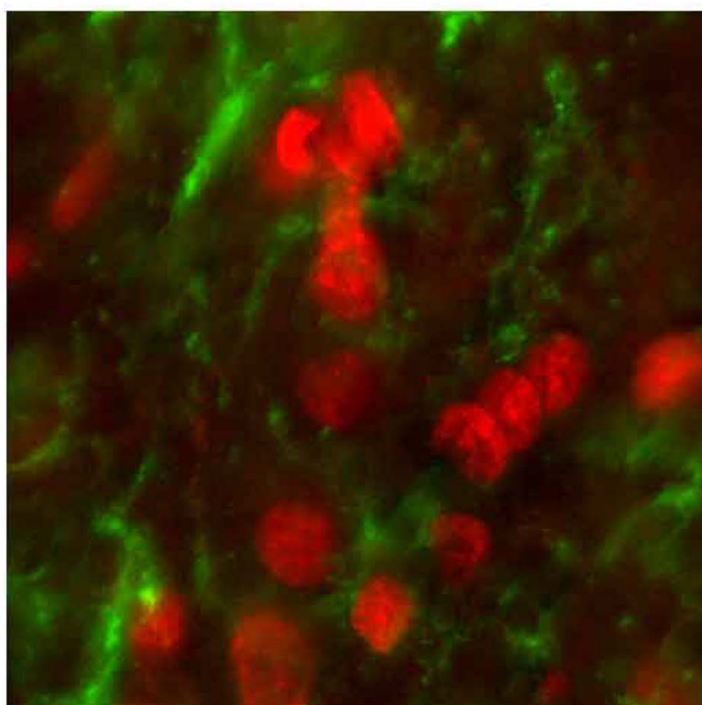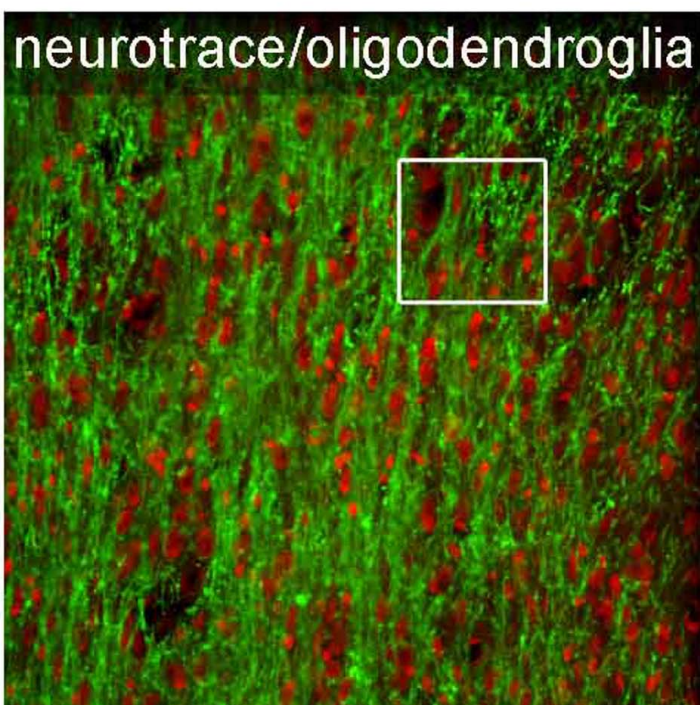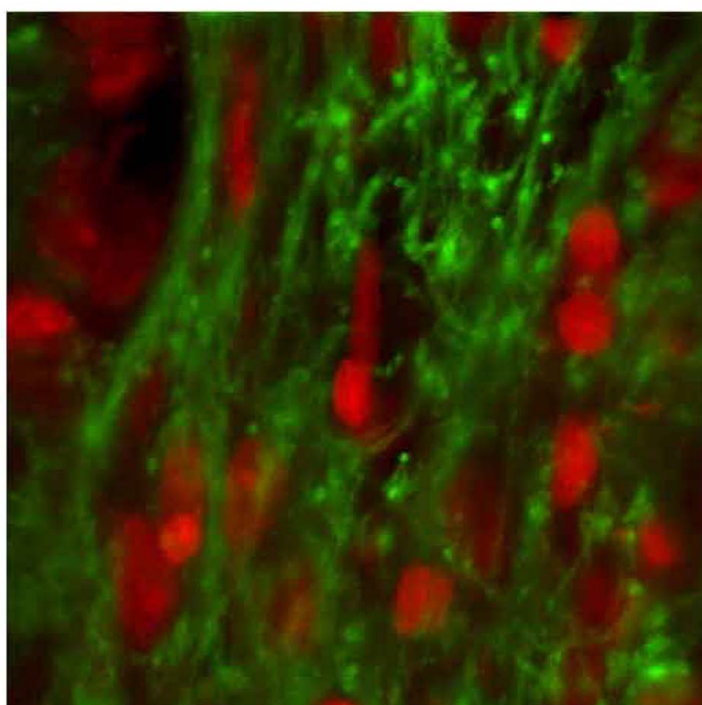

Supplement: 1750-1326-5-5-S2.pdf [file 1750-1326-5-5-S2.pdf]
